# Supplementary material
Source: Royal Society of Chemistry journal article supplement (doi:10.1039/d5tc03885e)
Supplement: d5tc03885e1.pdf [file d5tc03885e1.pdf]

## Supporting Information for

### Targeted Fluorescence Enhancement of Acridones by Hydrogen

#### Bonding in Solution and Solid State

Matthias Jantz<sup>1</sup>, David Klaverkamp<sup>1</sup>, Benedikt Bendel<sup>2</sup>, Takin Haj Hassani Sohi<sup>3</sup>,  
Martin H. Polko<sup>3</sup>, Lennart Bunnemann<sup>4</sup>, Tobias Böhmer<sup>5</sup>, Markus Putscher<sup>5</sup>, Christel M.  
Marian<sup>5</sup>, Constantin Czekelius<sup>4\*</sup>, Vera Vasylyeva<sup>3\*</sup>, Markus Suta<sup>2</sup>, and Peter Gilch<sup>1\*</sup>

<sup>1</sup>Institut für Physikalische Chemie, Mathematisch-Naturwissenschaftliche Fakultät,  
Heinrich-Heine-Universität Düsseldorf, Universitätsstr. 1, 40225 Düsseldorf, Germany

<sup>2</sup>Anorganische Photoaktive Materialien, Institut für Anorganische Chemie und  
Strukturchemie, Mathematisch-Naturwissenschaftliche Fakultät, Heinrich-Heine-  
Universität Düsseldorf, Universitätsstr. 1, 40225 Düsseldorf, Germany

<sup>3</sup>Molecular Crystal Engineering, Institut für Anorganische Chemie und  
Strukturchemie, Mathematisch-Naturwissenschaftliche Fakultät, Heinrich-Heine-  
Universität Düsseldorf, Universitätsstr. 1, 40225 Düsseldorf, Germany

<sup>4</sup>Institut für Organische Chemie und Makromolekulare Chemie, Mathematisch-  
Naturwissenschaftliche Fakultät, Heinrich-Heine-Universität Düsseldorf,  
Universitätsstr. 1, 40225 Düsseldorf, Germany

<sup>5</sup>Institut für Theoretische Chemie und Computerchemie, Mathematisch-  
Naturwissenschaftliche Fakultät, Heinrich-Heine-Universität Düsseldorf,  
Universitätsstr. 1, 40225 Düsseldorf, Germany

\*Corresponding authors' e-mails: constantin.czekelius@hhu.de, vera.vasylyeva-shor@hhu.de  
and gilch@hhu.de

## 29 Details of data evaluation and modelling

30 The analysis of the titration curve in Figure 2 relied on a 1:1 binding model  $NMA+SCat \rightleftharpoons$   
31  $NMA \cdots SCat$  in which NMA and SCat form a hydrogen-bonded complex  $NMA \cdots SCat$ .  
32 Considering the law of mass action, the dissociation constant ( $K_D$ ) of  $NMA \cdots SCat$  depends on  
33 the equilibrium concentrations of NMA, SCat and the coordinated form  $NMA \cdots SCat$ ,

$$K_D = \frac{[NMA][SCat]}{[NMA \cdots SCat]} \quad (S1)$$

34

35 It should be noted that  $K_D$  is an effective value, as SCat molecules presumably forms hydrogen  
36 bonds among each other. For the coordination of NMA and SCat, the hydrogen bond between  
37 the SCat molecules must first be disrupted. Since SCat is present in excess, it can be expected  
38 that  $[SCat]$  corresponds approximately to the initial concentration  $[SCat]_0$ ,

$$[SCat] \approx [SCat]_0. \quad (S2)$$

39 The ratio between the free and coordinated form can be calculated accordingly as follows,

$$\frac{[NMA]}{[NMA \cdots SCat]} = \frac{K_D}{[SCat]_0}. \quad (S3)$$

40

41 To determine the  $K_D$  value, the change in fluorescence signal  $\Delta y$  of NMA upon SCat addition  
42 was recorded as a function of the concentration  $[SCat]_0$ . The following relation between the  
43 signal change  $\Delta y$  and the concentration  $[SCat]_0$  can be derived:<sup>1,2</sup>

$$\Delta y = \frac{y_m - y_0}{2[NMA]_0} \cdot ([NMA]_0 + [SCat]_0 + K_D - \sqrt{([NMA]_0 + [SCat]_0 + K_D)^2 - 4 \cdot [NMA]_0 \cdot [SCat]_0}). \quad (S4)$$

44  $y_m$  is the fluorescence signal at infinite SCat concentration and  $y_0$  is the fluorescence signal in  
45 the absence of SCat. Fitting the experimental data to this function affords the equilibrium  
46 constant  $K_D$  and the fluorescence signal for infinite  $[SCat]$ .

47 The dissociation constant  $K_D$  can be related with a standard Gibbs free energy  $\Delta G_D^0$   
 48 consisting of an enthalpic ( $\Delta H_D^0$ ) and entropic ( $\Delta S_D^0$ ) contribution,

$$\frac{K_D}{c_0} = e^{-\frac{\Delta G_D^0}{RT}} = e^{-\frac{\Delta H_D^0}{RT}} \cdot e^{+\frac{\Delta S_D^0}{R}}. \quad (\text{S5})$$

49 Here,  $c_0 = 1 \text{ mol/l}$  is the reference concentration. Assuming that the complexation by SCat does  
 50 not change the vibrational degrees of freedom, the reaction entropy  $\Delta S_D^0$  can be related with the  
 51 molar volume  $\bar{V}_{NMA \cdots SCat}$  of the contact pair and the reference concentration,<sup>3,4</sup>

$$\Delta S_D^0 = R \cdot \ln \left( \frac{1}{c_0 \cdot \bar{V}_{NMA \cdots SCat}} \right). \quad (\text{S6})$$

52  $\bar{V}_{NMA \cdots SCat}$  was obtained by multiplying the van der Waals volume of the contact pair (522.736  
 53  $\text{\AA}^3$ ), with Avogadro's number  $N_a$ ,  $\bar{V}_{NMA \cdots SCat} = 0.315 \text{ l/mol}$ , The van der Waals volume was  
 54 computed using the MoloVol software<sup>5</sup> with the quantum-chemically optimized structure as an  
 55 input. Combining eq. S5 and S6 relates the dissociation constant  $K_D$  with the reaction enthalpy  
 56  $\Delta H_D^0$ ,

$$\Delta H_D^0 = RT \cdot \ln(K_D \cdot \bar{V}_{NMA \cdots SCat}). \quad (\text{S7})$$

57 Note that for the dissociation the enthalpy  $\Delta H_D^0 > 0$  and the entropy  $\Delta S_D^0 > 0$ .

58 The fluorescence quantum yield ( $\phi_{fl}$ ) is the product of the radiative rate constant ( $k_{rad}$ )  
 59 and the lifetime ( $\tau$ ),

$$\phi_{fl} = k_{rad} \cdot \tau. \quad (\text{S8})$$

60

61 If the constant  $k_{rad}$  is not affected by complexation, the relative increase of the fluorescence  
 62 quantum yield must be proportional to the increase of the relative, averaged lifetime.

63 However, as the fluorescence spectrum of NMA $\cdots$ SCat is shifted with respect to the one  
 64 of free NMA, a correction factor X to account for the different coverage of the emission spectra  
 65 by the detection bandpass must be introduced,

$$X = \frac{\frac{Area_{Bandpass}^{NMA}}{Area_{Total}^{NMA}}}{\frac{Area_{Bandpass}^{NMA \cdots SCat}}{Area_{Total}^{NMA \cdots SCat}}} \quad (S9)$$

66

67 Here,  $Area_{Bandpass}^{NMA}$  is the spectral integral of the NMA fluorescence for the interval given by  
 68 the detection bandpass in the TCSPC experiment.  $Area_{Total}^{NMA}$  is the spectral integral covering the  
 69 NMA fluorescence completely.  $Area_{Bandpass}^{NMA \cdots SCat}$  and  $Area_{Total}^{NMA \cdots SCat}$  are respective values for  
 70 complexed NMA. This correction factor takes into account that for a set spectral detection  
 71 window varying portion of the fluorescence spectra of the species fall into this window (Figure  
 72 S1).

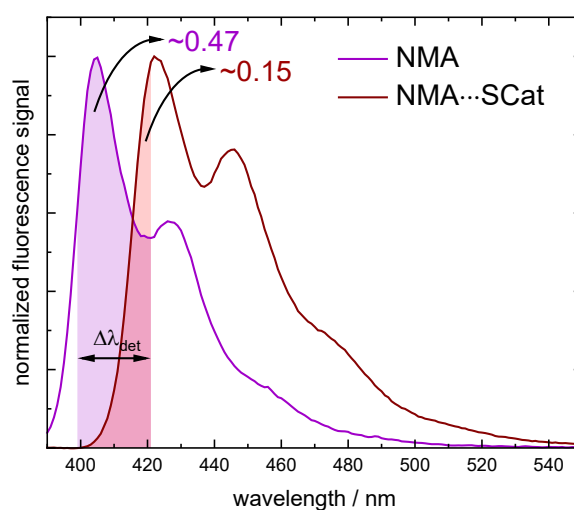

73  
 74 **Figure S1:** Normalized emission spectra of NMA (9.3  $\mu$ M) in the absence (purple) and  
 75 presence of SCat (2.2 mM, dark red). The residual contribution of free NMA was scaled and  
 76 subtracted to obtain the NMA  $\cdots$  SCat spectrum. The relative portion of the integrals which are  
 77 covered by the detection bandpass ( $\Delta\lambda_{det}$ ) centered at 410 nm are highlighted with their  
 78 respective color.

79

80 X results from the ratio from the integral covered by the bandpass of each species to the  
 81 respective integral over the whole emission region. The corrected, averaged lifetime  $\overline{\tau^{cor}}$  for  
 82 the respective concentration can be calculated as follows:

$$\overline{\tau^{cor}}([SCat]) = \frac{\sum_{i=1,2,4} A_{NMA,i}([SCat]) \cdot \tau_{NMA,i+X} \cdot A_{NMA \dots SCat,3}([SCat]) \cdot \tau_{NMA \dots SCat,3}}{\sum_{i=1,2,4} A_{NMA,i}([SCat]) + X \cdot A_{NMA \dots SCat,3}([SCat])}. \quad (S10)$$

83

84 The relative, corrected, averaged lifetime is obtained by dividing  $\overline{\tau^{cor}}([SCat])$  by  $\overline{\tau^{cor}}([0])$ . The  
 85 amplitudes and lifetimes obtained from the fits to the TCSPC data are shown in Table S1 while  
 86 the corrected amplitudes and lifetimes are shown in Table S2.

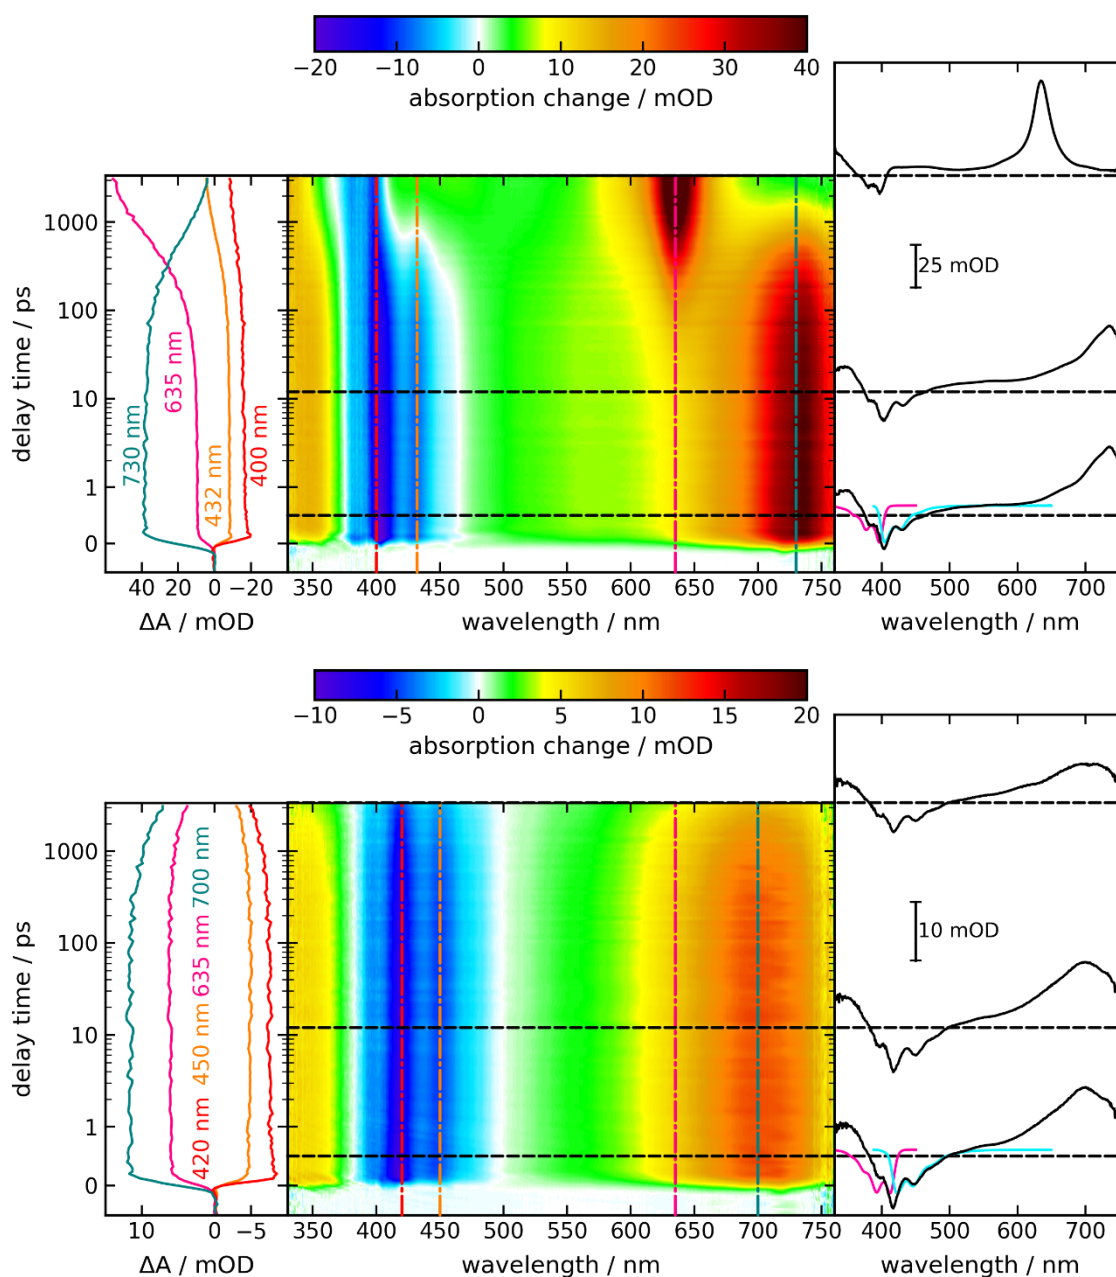

88 **Figure S2:** Femtosecond transient absorption (fsTA) measurements on NMA (top; 1.86 mM  
 89 (NMA)) and NMA in the presence of SCat (bottom; 1.5 mM (SCat)) in toluene. The excitation  
 90 wavelength was set to 400 nm. In the central contour plots, the difference absorption signal is  
 91 color-coded. Vertical lines mark the spectral positions corresponding to the time traces  
 92 displayed on the left, while horizontal lines indicate selected delay times for the difference  
 93 spectra shown on the right. The spectra at 0.6 ps (black) were compared to the normalized  
 94 ground state absorption spectra (pink) and fluorescence (light blue) converted into stimulated  
 95 emission spectra.<sup>6, 7</sup> The plot for NMA...SCat was corrected for the minor contribution of free  
 96 NMA.

97 **The determination of the triplet quantum yield ( $\phi_T$ )** is based on the comparison of the  
 98 ground state bleach (GSB) signal at early and late delay times. After 3.3 ns no signal  
 99 contribution from the stimulated emission is left. The remaining GSB signal can thus be  
 100 attributed to molecules in the triplet state. To obtain the yield  $\phi_T$ , the absorption spectrum of  
 101 NMA was flipped, scaled and aligned with the respective ground state bleach at 200 fs and 3.3  
 102 ns after excitation (Figure S3). The fraction of the scaling factors for early and late delay times  
 103 yields  $\phi_T$  to be  $\sim 0.9$ .

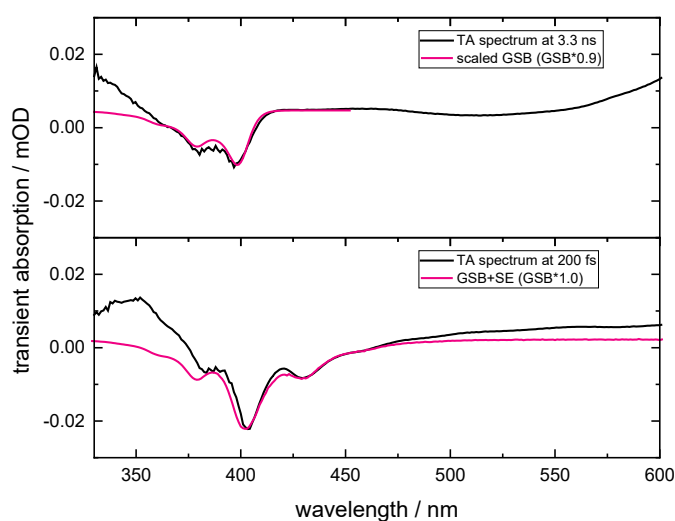

104  
 105 **Figure S3:** Determination of the triplet yield  $\phi_T$  of NMA in toluene. In the lower panel the  
 106 transient absorption spectrum at 200 fs is shown in black while the sum of the flipped absorption  
 107 and stimulated emission spectra is shown in pink (scaling factor 1.0). In the upper panel the  
 108 transient absorption spectrum at 3.3 ns is shown in black, while the flipped absorption spectrum  
 109 is shown in pink (scaling factor 0.9).

110  
 111 **The determination of the equilibrium constant  $K$**  between the  ${}^1\pi\pi^*$  and  ${}^3n\pi^*$  states is detailed  
 112 in ref.<sup>8</sup> and relies on a single-exponential fit of the spectrally integrated stimulated emission.  
 113 The fit yields the value of the integral at time zero ( $I_0$ ) and after equilibration ( $I_{eq}$ ) (Figure S4).  
 114 These values are related with the equilibrium constant  $K$  via,

$$\frac{I_0 - I_{eq}}{I_{eq}} = K = \frac{[{}^3n\pi^*]}{[{}^1\pi\pi^*]} \quad (\text{S11})$$

115 Note, that  $K$  is hereby defined with  ${}^3n\pi^*$  as the product. The fit yields a  $K$  value of 0.63 and a  
 116 time constant of 56 ps. Assuming, that only one triplet sub-level is populated and entropy  
 117 changes can be neglected, the constant  $K$  can be correlated to a single-triplet energy gap ( $\Delta E_{ST}$ )  
 118 as follows,

$$\Delta E_{ST} = -k_B T \cdot \ln K. \quad (\text{S12})$$

119 With the thermal energy  $k_B T$  at room temperature, the  ${}^3n\pi^*$  state is placed 0.012 eV ( $95 \text{ cm}^{-1}$ )  
 120 above the  ${}^1\pi\pi^*$  one. For the NMA...SCat complex no indications for an equilibration are found.

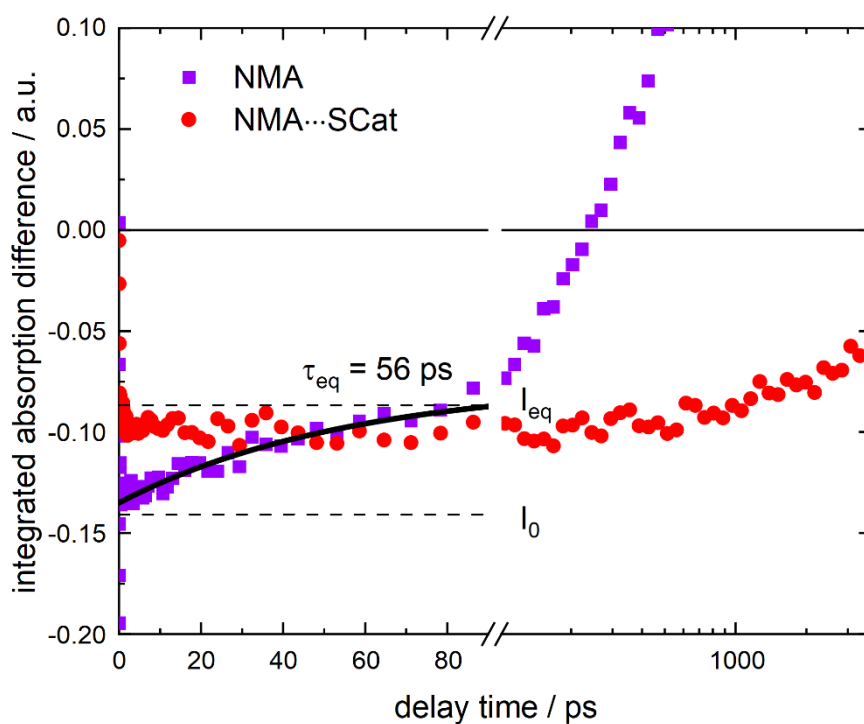

121 **Figure S4:** Decay of the spectrally integrated stimulated emission (SE) of NMA (red) and  
 122 NMA+SCat (purple) in toluene. The boundaries of integration were set within the SE, where  
 123 SE and the ground state bleach do not overlap (NMA: 420-500 nm, NMA...SCat: 440-550 nm).  
 124 For NMA the increase in the integrated absorption difference is fitted single-exponentially at  
 125 early delay times and the parameters  $I_0$  and  $I_{eq}$  are marked with dashed lines.

126 **Amplitudes and Time Constants of the TCSPC Measurement in Solution**

127 **Table S1:** Amplitudes ( $A$ ) and time constants ( $\tau$ ) obtained from the fits to the TCSPC data of  
 128 NMA in toluene in the absence and in the presence of different SCat concentrations. Depicted  
 129 are also the amplitude-weighted average lifetimes ( $\bar{\tau}$ ) and the increase of the averaged lifetime  
 130 ( $\bar{\tau}_{rel}$ ) compared to the lifetime of NMA in absence of SCat.

| [SCat] / $10^{-4}$ M | $A_1$                  | $\tau_1$ / ns          | $A_2$                  | $\tau_2$ / ns          | $A_3$                  | $\tau_3$ / ns          | $A_4$                   | $\tau_4$ / ns           | $\bar{\tau}$ / ns      | $\bar{\tau}_{rel}$ |
|----------------------|------------------------|------------------------|------------------------|------------------------|------------------------|------------------------|-------------------------|-------------------------|------------------------|--------------------|
| 0                    | 0.5959 $\pm$<br>0.0358 | 0.7134 $\pm$<br>0.0214 | 0.4040 $\pm$<br>0.0566 | 1.0922 $\pm$<br>0.0218 |                        |                        | 0.0001 $\pm$<br>0.00001 | 18.2915<br>$\pm$ 0.0915 | 0.8686 $\pm$<br>0.0686 | 1.0000             |
| 1.84                 | 0.4487 $\pm$<br>0.1436 | 0.6917 $\pm$<br>0.0692 | 0.3725 $\pm$<br>0.1674 | 1.1030 $\pm$<br>0.0993 | 0.1787 $\pm$<br>0.0054 | 6.8600 $\pm$<br>0.0343 | 0.0001 $\pm$<br>0.00001 | 60.7553<br>$\pm$ 0.3038 | 1.9550 $\pm$<br>0.2184 | 2.2521             |
| 3.69                 | 0.5482 $\pm$<br>0.0384 | 0.7510 $\pm$<br>0.0451 | 0.1541 $\pm$<br>0.0986 | 1.3545 $\pm$<br>0.2167 | 0.2975 $\pm$<br>0.0238 | 6.8696 $\pm$<br>0.0343 | 0.0001 $\pm$<br>0.00002 | 59.8018<br>$\pm$ 0.2990 | 2.6733 $\pm$<br>0.2173 | 3.0794             |
| 5.53                 | 0.4704 $\pm$<br>0.0517 | 0.7340 $\pm$<br>0.0514 | 0.1517 $\pm$<br>0.0971 | 1.3473 $\pm$<br>0.2290 | 0.3777 $\pm$<br>0.0264 | 6.8682 $\pm$<br>0.0343 | 0.0002 $\pm$<br>0.00002 | 57.4952<br>$\pm$ 0.2875 | 3.1581 $\pm$<br>0.2311 | 3.6379             |
| 6.33                 | 0.4516 $\pm$<br>0.0587 | 0.7437 $\pm$<br>0.0595 | 0.1366 $\pm$<br>0.0984 | 1.3649 $\pm$<br>0.2730 | 0.4117 $\pm$<br>0.0288 | 6.8762 $\pm$<br>0.0344 | 0.0002 $\pm$<br>0.00002 | 62.2727<br>$\pm$ 0.3114 | 3.3702 $\pm$<br>0.2480 | 3.8822             |
| 7.38                 | 0.4565 $\pm$<br>0.0365 | 0.7591 $\pm$<br>0.0455 | 0.0973 $\pm$<br>0.0613 | 1.5299 $\pm$<br>0.0321 | 0.4461 $\pm$<br>0.0223 | 6.8777 $\pm$<br>0.0344 | 0.0002 $\pm$<br>0.00002 | 58.0402<br>$\pm$ 0.2902 | 3.5746 $\pm$<br>0.1838 | 4.1177             |
| 22.1                 | 0.3352 $\pm$<br>0.0101 | 0.7919 $\pm$<br>0.0238 | 0.0449 $\pm$<br>0.0081 | 2.9059 $\pm$<br>0.6102 | 0.6196 $\pm$<br>0.0062 | 6.9126 $\pm$<br>0.0346 | 0.0003 $\pm$<br>0.00002 | 59.7140<br>$\pm$ 0.2986 | 4.6970 $\pm$<br>0.0611 | 5.4106             |
| 22.1<br>(412 nm)     |                        |                        | 0.0130 $\pm$<br>0.0031 | 1.3150 $\pm$<br>0.4077 | 0.9867 $\pm$<br>0.0049 | 6.9349 $\pm$<br>0.0347 | 0.0003 $\pm$<br>0.00003 | 60.9158<br>$\pm$ 0.3046 | 6.8802 $\pm$<br>0.0487 | 7.9255             |

131  
 132  
 133  
 134  
 135  
 136  
 137

**Table S2:** Amplitudes ( $A^{cor}$ ) and time constants ( $\tau^{cor}$ ) obtained from the fits of the TCSPC data corrected for the different fractions which were covered by the detection bandpass. Depicted are also the “corrected” amplitude-weighted average lifetimes ( $\bar{\tau}^{cor}$ ) and the increase of the “corrected” averaged lifetime ( $\bar{\tau}_{rel}^{cor}$ ) compared to the lifetime of NMA in absence of SCat.

| [SCat] / $10^{-4}$ M | $A_1^{cor}$ | $\tau_1$ / ns | $A_2^{cor}$ | $\tau_2$ / ns | $A_3^{cor}$ | $\tau_3$ / ns | $A_4^{cor}$ | $\tau_4$ / ns | $\bar{\tau}^{cor}$ / ns | $\bar{\tau}_{rel}^{cor}$ |
|----------------------|-------------|---------------|-------------|---------------|-------------|---------------|-------------|---------------|-------------------------|--------------------------|
| 0                    | 0.5959      | 0.7134        | 0.4040      | 1.0922        |             |               | 0.0001      | 18.2915       | 0.8686                  | 1.0000                   |
| 1.84                 | 0.3228      | 0.6920        | 0.2675      | 1.1030        | 0.4096      | 6.8600        | 0.00007     | 60.7553       | 3.3327                  | 3.8390                   |
| 3.69                 | 0.3275      | 0.7510        | 0.0920      | 1.3540        | 0.5805      | 6.8700        | 0.00006     | 59.8018       | 4.3619                  | 5.0245                   |
| 5.53                 | 0.2469      | 0.7340        | 0.0799      | 1.3470        | 0.6731      | 6.8700        | 0.00011     | 57.4952       | 4.9192                  | 5.6665                   |
| 6.33                 | 0.2236      | 0.7440        | 0.0678      | 1.3640        | 0.7086      | 6.8800        | 0.00010     | 62.2727       | 5.1400                  | 5.9209                   |
| 7.38                 | 0.2208      | 0.7590        | 0.0470      | 1.5300        | 0.7321      | 6.8800        | 0.00010     | 58.0402       | 5.2819                  | 6.0844                   |
| 22.1                 | 0.1074      | 0.7919        | 0.0144      | 2.9060        | 0.8781      | 6.9130        | 0.00010     | 59.7150       | 6.2027                  | 7.1450                   |

138

139 **Spectrally Resolved TCSPC Measurement of NMA in Solution**

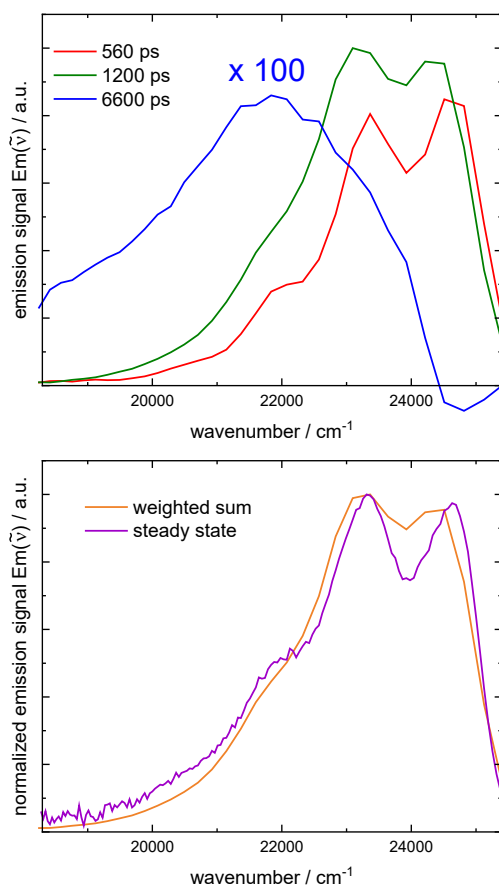

140  
141 **Figure S5:** Emission spectrum of NMA in toluene. Top panel: Decay associated spectra  
142 (DAS, red, green and blue (scaled by a factor of 100)) obtained from a global fit of the TRES  
143 measurement. Bottom panel: Steady state spectrum (purple) and the weighted sum (orange) of  
144 the DAS.

145 **<sup>1</sup>H NMR Measurement of NMA, SCat and the Mixture in Solution**

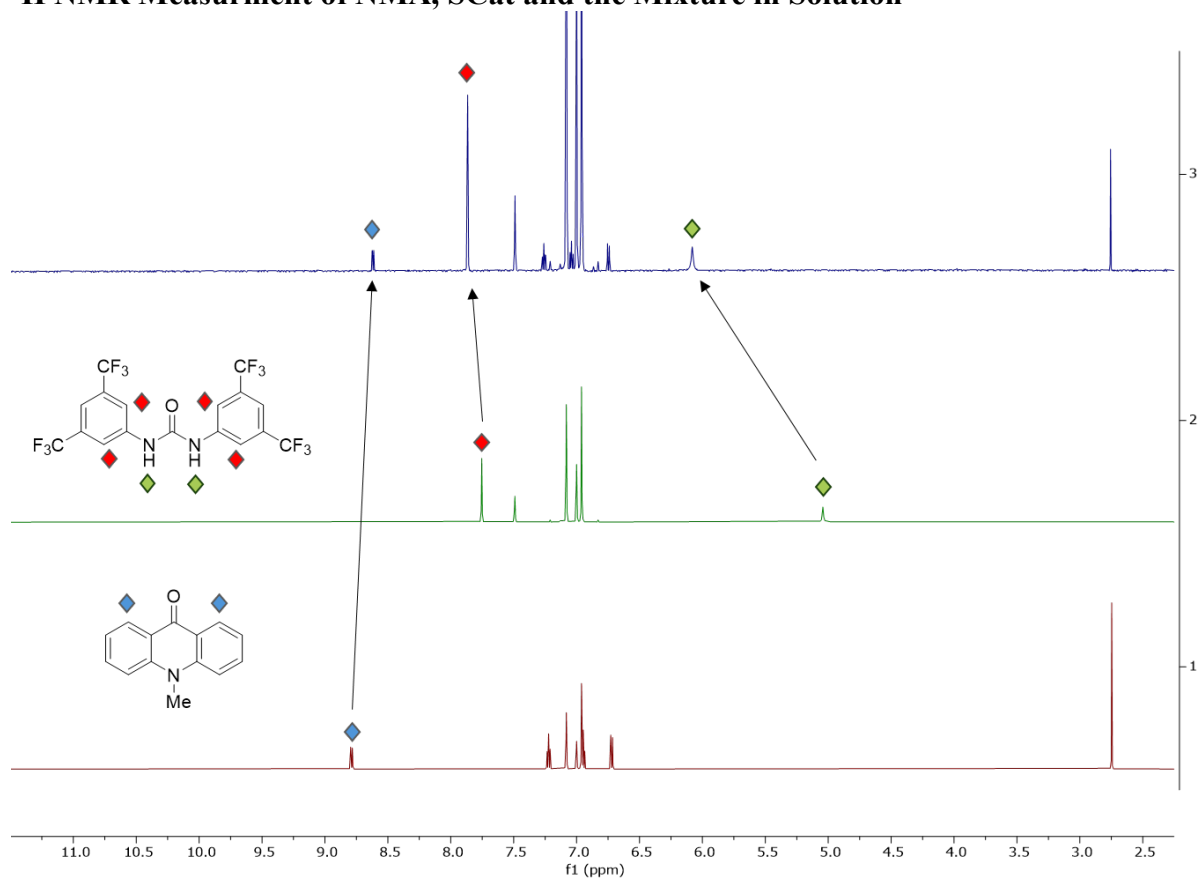

146

147 **Figure S6:** <sup>1</sup>H NMR spectra of 10-methylacridin-9(10*H*)-one,  
 148 bis(trifluoromethyl)phenyl)urea and a mixture of both (concentrations always 0.1 M in toluene-  
 149 *d*<sub>8</sub>); in the mixture of both a ratio of ca. 1 to 3:1 acridone to urea was present; the aromatic  
 150 protons in 1,8-position of the acridone are marked with blue diamonds and the aromatic protons  
 151 of the 1,3-bis(3,5-bis(trifluoromethyl)phenyl)urea are marked with red diamonds, the  
 152 respective urea protons are marked with green diamonds.

## 153 Crystallographic details

154

155 Table S3: Crystallographic data of NMA...SCat co-crystal and SCat single crystals.

|                                                                           | NMA...SCat                                                                                          | SCat                                                                         |
|---------------------------------------------------------------------------|-----------------------------------------------------------------------------------------------------|------------------------------------------------------------------------------|
| <b>Empirical formula</b>                                                  | C <sub>17</sub> H <sub>8</sub> F <sub>12</sub> N <sub>2</sub> O, C <sub>14</sub> H <sub>11</sub> NO | C <sub>17</sub> H <sub>8</sub> F <sub>12</sub> N <sub>2</sub> O              |
| <b>Formula weight</b>                                                     | 693.49                                                                                              | 484.25                                                                       |
| <b>Temperature /K</b>                                                     | 149.99(10)                                                                                          | 150.00(10)                                                                   |
| <b>Crystal system</b>                                                     | triclinic                                                                                           | triclinic                                                                    |
| <b>Space group</b>                                                        | <i>P</i> $\bar{1}$ (no. 2)                                                                          | <i>P</i> $\bar{1}$ (no. 2)                                                   |
| <b><i>a</i> / Å</b>                                                       | 8.4376(2)                                                                                           | 9.0838(2)                                                                    |
| <b><i>b</i> / Å</b>                                                       | 13.4590(3)                                                                                          | 12.8101(3)                                                                   |
| <b><i>c</i> / Å</b>                                                       | 14.4668(3)                                                                                          | 16.3601(3)                                                                   |
| <b><math>\alpha</math> / °</b>                                            | 115.684(2)                                                                                          | 77.989(2)                                                                    |
| <b><math>\beta</math> / °</b>                                             | 96.017(2)                                                                                           | 84.130(2)                                                                    |
| <b><math>\gamma</math> / °</b>                                            | 103.868(2)                                                                                          | 77.399(2)                                                                    |
| <b><i>V</i> / Å<sup>3</sup></b>                                           | 1395.90(6)                                                                                          | 1813.98(7)                                                                   |
| <b><i>Z</i></b>                                                           | 2                                                                                                   | 4                                                                            |
| <b><math>\rho_{\text{calc}}</math> / g/cm<sup>3</sup></b>                 | 1.650                                                                                               | 1.773                                                                        |
| <b><math>\mu</math> / mm<sup>-1</sup></b>                                 | 1.419                                                                                               | 1.799                                                                        |
| <b><i>F</i>(000)</b>                                                      | 700.0                                                                                               | 960.0                                                                        |
| <b>Crystal size /mm<sup>3</sup></b>                                       | 0.23 × 0.09 × 0.04                                                                                  | 0.11 × 0.06 × 0.03                                                           |
| <b>Radiation</b>                                                          | Cu K $\alpha$ ( $\lambda$ = 1.54184)                                                                | Cu K $\alpha$ ( $\lambda$ = 1.54184)                                         |
| <b>2<math>\theta</math> range for data collection / °</b>                 | 6.982 to 152.848                                                                                    | 5.532 to 159.314                                                             |
| <b>Index ranges</b>                                                       | -9 ≤ <i>h</i> ≤ 10, -16 ≤ <i>k</i> ≤ 16, -17 ≤ <i>l</i> ≤ 18                                        | -11 ≤ <i>h</i> ≤ 11, -16 ≤ <i>k</i> ≤ 16, -20 ≤ <i>l</i> ≤ 20                |
| <b>Reflections collected</b>                                              | 35566                                                                                               | 68318                                                                        |
| <b>Independent reflections</b>                                            | 5637 [ <i>R</i> <sub>int</sub> = 0.0664, <i>R</i> <sub>sigma</sub> = 0.0349]                        | 7734 [ <i>R</i> <sub>int</sub> = 0.0958, <i>R</i> <sub>sigma</sub> = 0.0475] |
| <b>Data/restraints/parameters</b>                                         | 5637/9/593                                                                                          | 7734/174/677                                                                 |
| <b>Goodness-of-fit on <i>F</i><sup>2</sup></b>                            | 1.052                                                                                               | 1.030                                                                        |
| <b><i>T</i><sub>min</sub> / <i>T</i><sub>max</sub></b>                    | 0.599, 1.000                                                                                        | 0.804, 1.000                                                                 |
| <b>Final <i>R</i> indexes [<i>I</i> ≥ 2<math>\sigma</math>(<i>I</i>)]</b> | <i>R</i> <sub>1</sub> = 0.0378, w <i>R</i> <sub>2</sub> = 0.1004                                    | <i>R</i> <sub>1</sub> = 0.0636, w <i>R</i> <sub>2</sub> = 0.1204             |
| <b>Final <i>R</i> indexes [all data]</b>                                  | <i>R</i> <sub>1</sub> = 0.0449, w <i>R</i> <sub>2</sub> = 0.1048                                    | <i>R</i> <sub>1</sub> = 0.0817, w <i>R</i> <sub>2</sub> = 0.1279             |
| <b>Largest diff. peak/hole / e Å<sup>-3</sup></b>                         | 0.22/-0.25                                                                                          | 0.45/-0.43                                                                   |

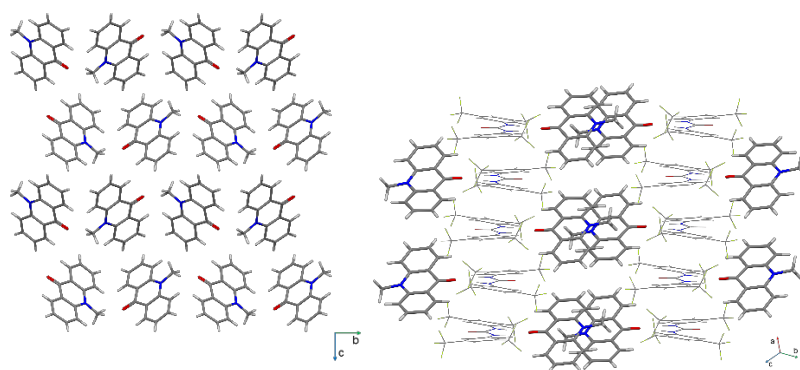

156

157 **Figure S7:** Packing of NMA (left) and NMA...SCat co-crystal (right). The Figure on the left  
 158 displays the herringbone pattern of stacked NMA units propagating in columns along the *a* axis.  
 159 (Right) Rearranged slipped stacking sandwiches of NMA are separated by SCat columns  
 160 formed *via* strong hydrogen bonds between each NMA and SCat entity. SCat is displayed in  
 161 wireframe style for clarity.

162

163 The X-ray powder diffraction (XRPD) pattern of the NMA...SCat co-crystals at room  
 164 temperature and the Rietveld refinement based on the single-crystal structure measured at 150  
 165 K is depicted in Fig. S8. No additional Bragg reflections could be identified that would indicate  
 166 the presence of a secondary phase.

167 **Table S4:** Derived lattice parameters from the Rietveld refinement of the powder diffraction  
 168 pattern measured at ambient conditions.

|                                            |                            |
|--------------------------------------------|----------------------------|
| <b>Crystal system</b>                      | triclinic                  |
| <b>Space group</b>                         | $P\bar{1}$ (no. 2)         |
| <b><i>Z</i></b>                            | 2                          |
| <b>Radiation, <math>\lambda</math> / Å</b> | Cu $K_{\alpha 1}$ , 1.5406 |
| <b><i>a</i> / Å</b>                        | 8.583(3)                   |
| <b><i>b</i> / Å</b>                        | 13.66(4)                   |
| <b><i>c</i> / Å</b>                        | 14.70(4)                   |
| <b><math>\alpha</math> / °</b>             | 114.717(8)                 |
| <b><math>\beta</math> / °</b>              | 97.08(2)                   |
| <b><math>\gamma</math> / °</b>             | 105.08(2)                  |
| <b><i>V</i> / Å<sup>3</sup></b>            | 1457.75                    |
| <b>2<math>\theta</math> range / °</b>      | 5.0 – 70.0                 |
| <b>2<math>\theta</math> step width / °</b> | 0.008                      |
| <b><i>R</i><sub>exp</sub>, %</b>           | 0.845                      |
| <b><i>R</i><sub>wp</sub>, %</b>            | 8.902                      |
| <b><i>R</i><sub>p</sub>, %</b>             | 6.660                      |
| <b><i>R</i><sub>Bragg</sub>, %</b>         | 1.987                      |
| <b>G.o.o.F.</b>                            | 10.531                     |

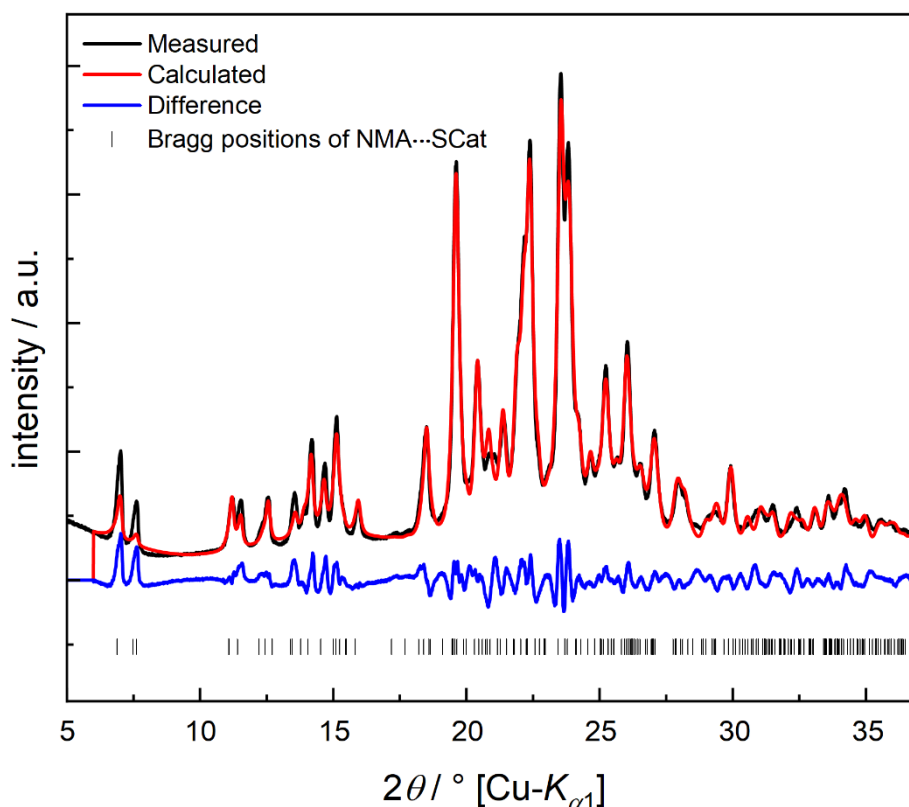

169

170 **Figure S8:** Experimental X-ray powder diffraction pattern of NMA...SCat (black) at 298 K  
 171 compared to its theoretical pattern (red) simulated from single-crystal data obtained at 150 K  
 172 (see Table S4).

173

#### 174 **Experimental and SCXRD Details of SCat Crystal Structure**

175 SCat single crystals were obtained from dissolution of 2 mg (4,13  $\mu\text{mol}$ ) SCat in 2 mL toluene  
 176 and slow evaporation of the solvent at ambient temperature. The asymmetric unit consists of  
 177 two SCat molecules arranged twisted at a  $53^\circ$  angle. The bifurcated N–H...O interactions  
 178 (N3A–H...O1A 2.809(2) Å, N4A–H...O1A 2.807(2) Å, and N2A–H...O2A 2.845(2) Å, N1A–  
 179 H...O2A 2.838(2) Å) between the carboxylic and the urea group form hydrogen bonded chains  
 180 along the crystallographic *a* axis throughout the crystal structure. Aromatic rings of SCat units

181 are connected via  $\pi\cdots\pi$  stacking interactions with centroid-centroid distances of 3.6535(14) Å  
182 and 3.7330(13) Å, respectively.

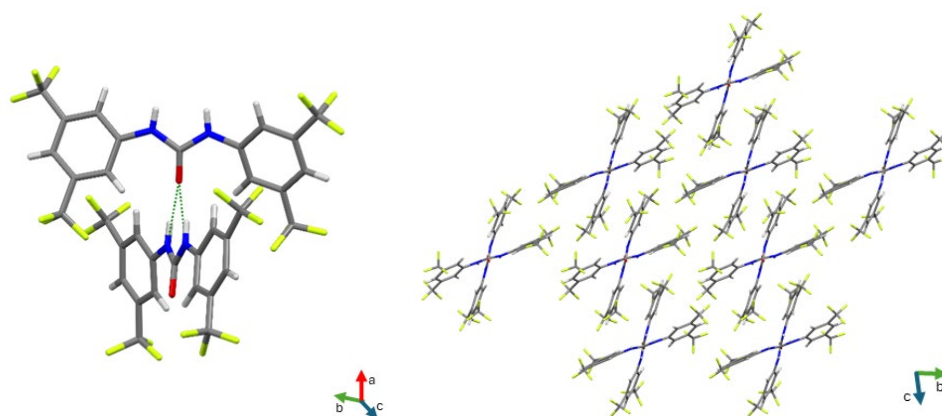

183

184 **Figure S9:** Crystal structure of SCat with  $Z' = 2$ . Bifurcated N–H $\cdots$ O interactions connect the  
185 carboxylic and the urea group. One SCat molecule in the asymmetric unit is involved in  $\pi$ -  
186 stacking interactions forming chains along the crystallographic  $b$  axis. The crystal packing  
187 (right) is displayed in a view along the crystallographic  $a$  axis.

188

189 **IR Spectra of NMA, SCat and NMA $\cdots$ SCat in the Solid State**

190

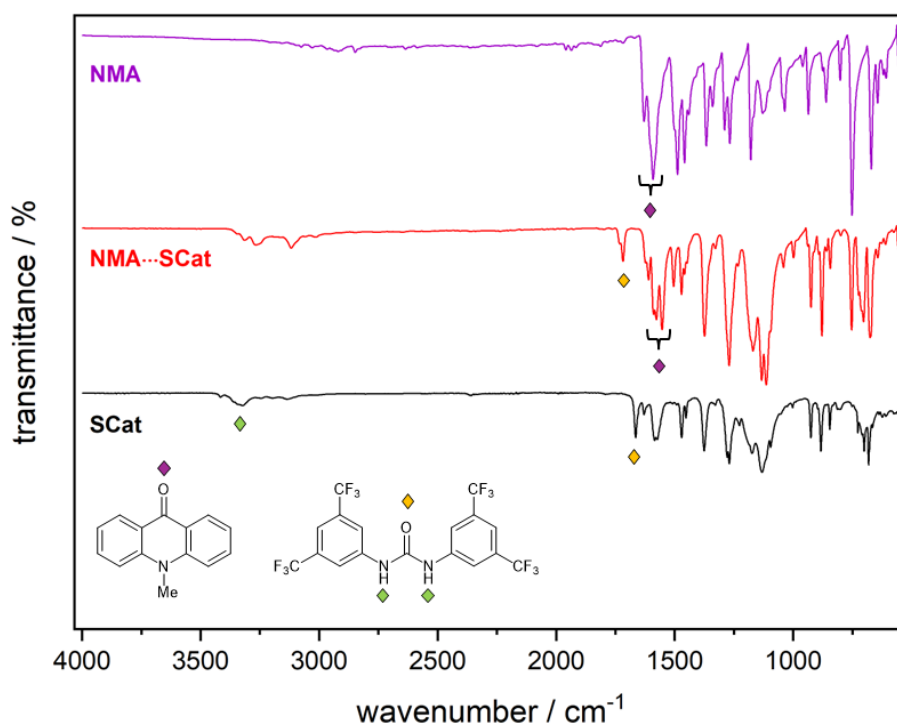

191

192 **Figure S10:** FTIR spectra of the NMA, NMA $\cdots$ SCat co-crystal and SCat measured at ambient  
193 temperature in the range of 4000  $\text{cm}^{-1}$  to 550  $\text{cm}^{-1}$ .

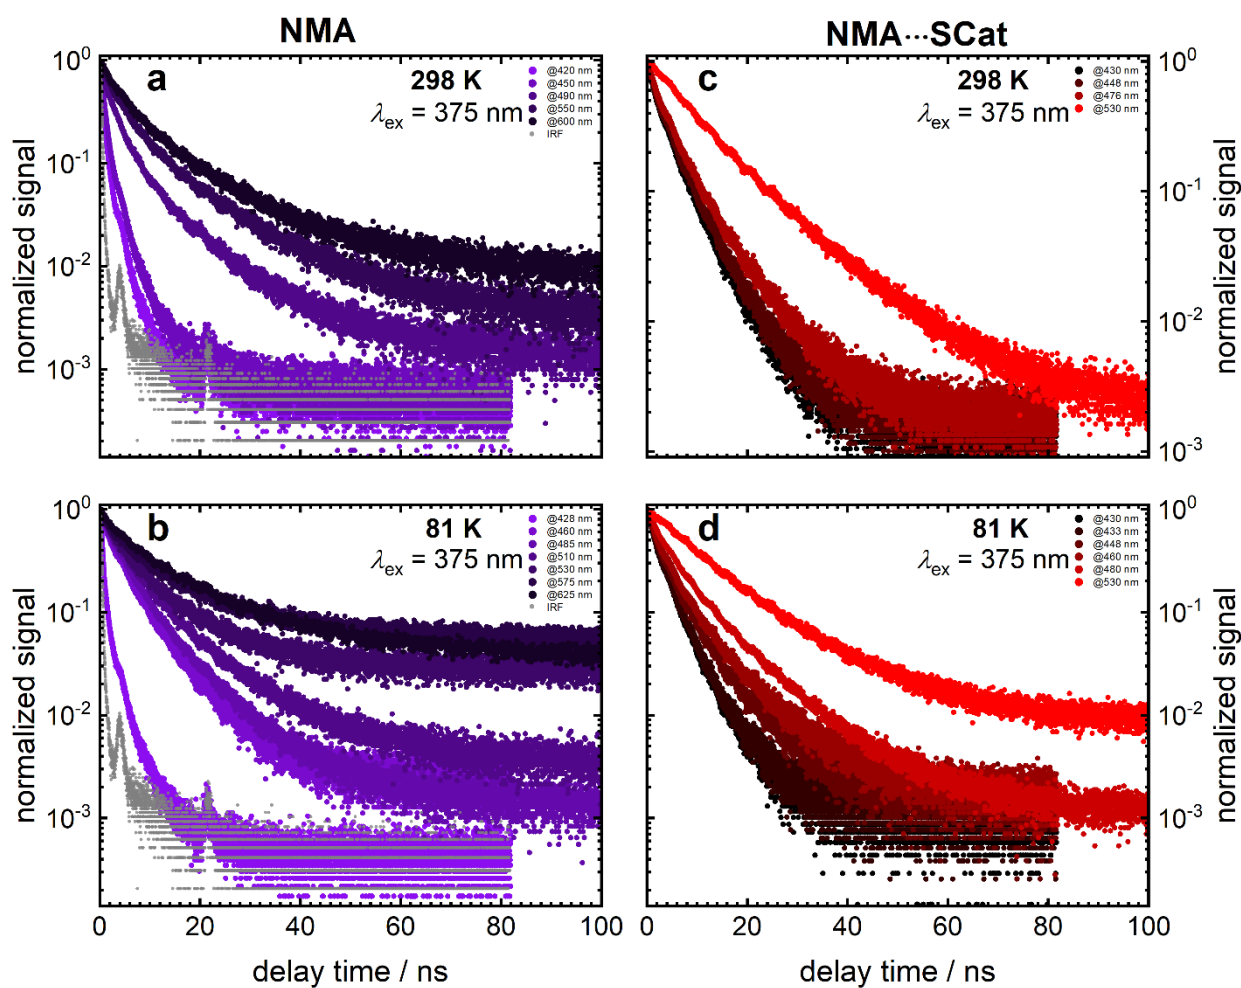

195

196 **Figure S11:** Luminescence decay measurements of NMA and NMA...SCat detected at different  
 197 emission wavelengths under direct excitation at 298 K (a, c) and 81 K (b, d). The resulting  
 198 decay times are compiled in Table S5 and S6.

199 **Table S5:** Amplitudes and lifetimes of NMA under direct excitation, detected at different  
 200 emission wavelengths at 298 K. The corresponding luminescence decay measurements are  
 201 depicted in Figure S11a.

| $\lambda_{em}/\text{nm}$ | $A_1$        | $\tau_1/\text{ns}$ | $A_2$       | $\tau_2/\text{ns}$ | $A_3$       | $\tau_3/\text{ns}$ |
|--------------------------|--------------|--------------------|-------------|--------------------|-------------|--------------------|
| 420                      | 0.848±0.008  | 0.486±0.015        | 0.15±0.005  | 1.988±0.04         | 0.002±0.001 | 9.479±1.422        |
| 450                      | 0.759±0.008  | 0.666±0.027        | 0.235±0.019 | 2.246±0.067        | 0.006±0.002 | 8.723±0.959        |
| 490                      | 0.207±0.002  | 0.550±0.007        | 0.657±0.002 | 2.84±0.013         | 0.126±0.002 | 10.638±0.077       |
| 550                      | 0.472±0.010  | 2.053±0.029        | 0.448±0.006 | 6.336±0.156        | 0.106±0.007 | 18.039±0.516       |
| 600                      | 0.295±0.0172 | 2.270±0.079        | 0.532±0.011 | 6.506±0.204        | 0.17±0.01   | 18.759±0.465       |

202

203 **Table S6:** Amplitudes and lifetimes of NMA under direct excitation, detected at different  
 204 emission wavelengths at 81 K. The corresponding luminescence decay measurements are  
 205 depicted in Figure S11b.

| $\lambda_{em}/\text{nm}$ | $A_1$       | $\tau_1/\text{ns}$ | $A_2$       | $\tau_2/\text{ns}$ | $A_3$       | $\tau_3/\text{ns}$ |
|--------------------------|-------------|--------------------|-------------|--------------------|-------------|--------------------|
| <b>428</b>               | 0.777±0.007 | 0.639±0.032        | 0.216±0.015 | 2.327±0.093        | 0.006±0.002 | 8.797±1.32         |
| <b>460</b>               | 0.381±0.006 | 1.457±0.017        | 0.632±0.004 | 5.012±0.065        | 0.038±0.007 | 12.856±0.874       |
| <b>485</b>               | 0.275±0.007 | 1.545±0.028        | 0.656±0.005 | 4.969±0.069        | 0.081±0.008 | 12.776±0.429       |
| <b>510</b>               | 0.298±0.009 | 1.73±0.038         | 0.617±0.006 | 5.642±0.103        | 0.119±0.009 | 15.188±0.426       |
| <b>530</b>               | 0.274±0.013 | 1.638±0.064        | 0.583±0.009 | 6.093±0.188        | 0.128±0.014 | 16.97±0.778        |
| <b>575</b>               | 0.235±0.011 | 1.778±0.085        | 0.536±0.009 | 7.302±0.237        | 0.161±0.013 | 21.781±0.823       |
| <b>625</b>               | 0.259±0.008 | 2.656±0.086        | 0.593±0.006 | 10.622±0.19        | 0.086±0.006 | 36.945±1.274       |

206

207 **Table S7:** Amplitudes and lifetimes of NMA···SCat under direct excitation, detected at different  
 208 emission wavelengths at 298 K. The corresponding luminescence decay measurements are  
 209 depicted in Figure S11c.

| $\lambda_{em}/\text{nm}$ | $A_1$       | $\tau_1/\text{ns}$ | $A_2$       | $\tau_2/\text{ns}$ | $A_3$       | $\tau_3/\text{ns}$ |
|--------------------------|-------------|--------------------|-------------|--------------------|-------------|--------------------|
| <b>430</b>               | 0.330±0.006 | 1.241±0.018        | 0.659±0.004 | 4.467±0.059        | 0.022±0.007 | 12.625±1.817       |
| <b>448</b>               | 0.229±0.007 | 1.240±0.023        | 0.689±0.006 | 4.622±0.07         | 0.03±0.01   | 12.056±1.646       |
| <b>476</b>               | 0.273±0.009 | 1.431±0.033        | 0.681±0.009 | 5.052±0.103        | 0.064±0.015 | 12.433±1.088       |
| <b>530</b>               | 0.973±0.005 | 9.580±0.035        | 0.054±0.005 | 26.014±1.25        |             |                    |

210

211 **Table S8:** Amplitudes and lifetimes of NMA···SCat under direct excitation, detected at different  
 212 emission wavelengths at 81 K. The corresponding luminescence decay measurements are  
 213 depicted in Figure S11d.

| $\lambda_{em}/\text{nm}$ | $A_1$       | $\tau_1/\text{ns}$ | $A_2$        | $\tau_2/\text{ns}$ | $A_3$       | $\tau_3/\text{ns}$ |
|--------------------------|-------------|--------------------|--------------|--------------------|-------------|--------------------|
| <b>430</b>               | 0.459±0.004 | 1.293±0.01         | 0.558±0.004  | 3.958±0.015        |             |                    |
| <b>433</b>               | 0.427±0.004 | 1.254±0.009        | 0.580±0.004  | 4.02±0.014         |             |                    |
| <b>448</b>               | 0.443±0.008 | 1.407±0.018        | 0.560±0.005  | 4.562±0.076        | 0.026±0.006 | 14.335±1.713       |
| <b>460</b>               | 0.449±0.007 | 1.236±0.02         | 0.609±0.005  | 4.574±0.075        | 0.072±0.009 | 12.399±0.664       |
| <b>480</b>               | 0.322±0.005 | 1.438±0.024        | 0.627±0.006  | 5.281±0.07         | 0.158±0.009 | 12.277±0.237       |
| <b>530</b>               | 0.954±0.002 | 10.333±0.029       | 0.0296±0.003 | 42.131±3.161       |             |                    |

214

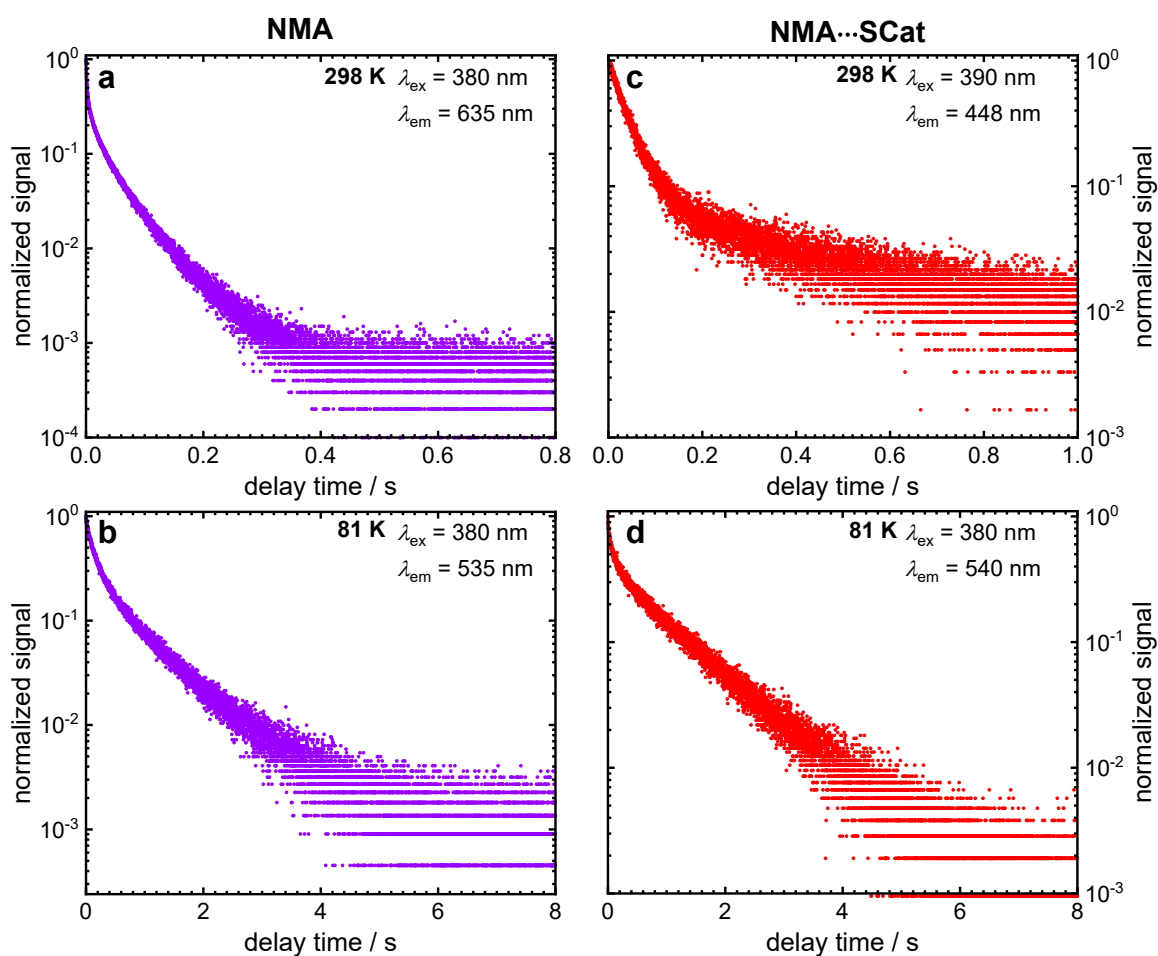

216

217 **Figure S12:** Luminescence decay measurements of NMA and NMA...SCat from 1 ms onwards  
 218 at 298 K (a, c) and 81 K (b, d). The detected emission wavelength corresponds with the emission  
 219 maximum after a 1 ms delay. The resulting decay times are depicted in Table S9 and S10.

220 **Table S9:** Amplitudes and lifetimes of NMA and NMA...SCat after a 1 ms delay at 298 K. The  
 221 corresponding luminescence decay measurements are depicted in Figure S12 (a, c).

|               | $A_1$             | $\tau_1 / \text{ms}$ | $A_2$               | $\tau_2 / \text{ms}$ | $A_3$             | $\tau_3 / \text{ms}$ |
|---------------|-------------------|----------------------|---------------------|----------------------|-------------------|----------------------|
| <b>NMA</b>    | $0.537 \pm 0.001$ | $1.206 \pm 0.005$    | $0.259 \pm 0.001$   | $8.987 \pm 0.059$    | $0.188 \pm 0.001$ | $46.357 \pm 0.127$   |
| <b>MPK002</b> | $0.893 \pm 0.002$ | $35.8403 \pm 0.145$  | $0.08224 \pm 0.002$ | $287.897 \pm 9.04$   |                   |                      |

222

223 **Table S10:** Amplitudes and lifetimes of NMA and NMA...SCat after a 1 ms delay at 81 K. The  
 224 corresponding luminescence decay measurements are depicted in Figure S12 (b, d).

|               | $A_1$             | $\tau_1 / \text{ms}$ | $A_2$             | $\tau_2 / \text{ms}$ | $A_3$             | $\tau_3 / \text{ms}$ |
|---------------|-------------------|----------------------|-------------------|----------------------|-------------------|----------------------|
| <b>NMA</b>    | $0.152 \pm 0.003$ | $21.66 \pm 0.746$    | $0.545 \pm 0.002$ | $148.274 \pm 1.125$  | $0.281 \pm 0.002$ | $757.495 \pm 3.463$  |
| <b>MPK002</b> | $0.427 \pm 0.002$ | $75.619 \pm 0.701$   | $0.417 \pm 0.001$ | $948.542 \pm 3.023$  |                   |                      |

225

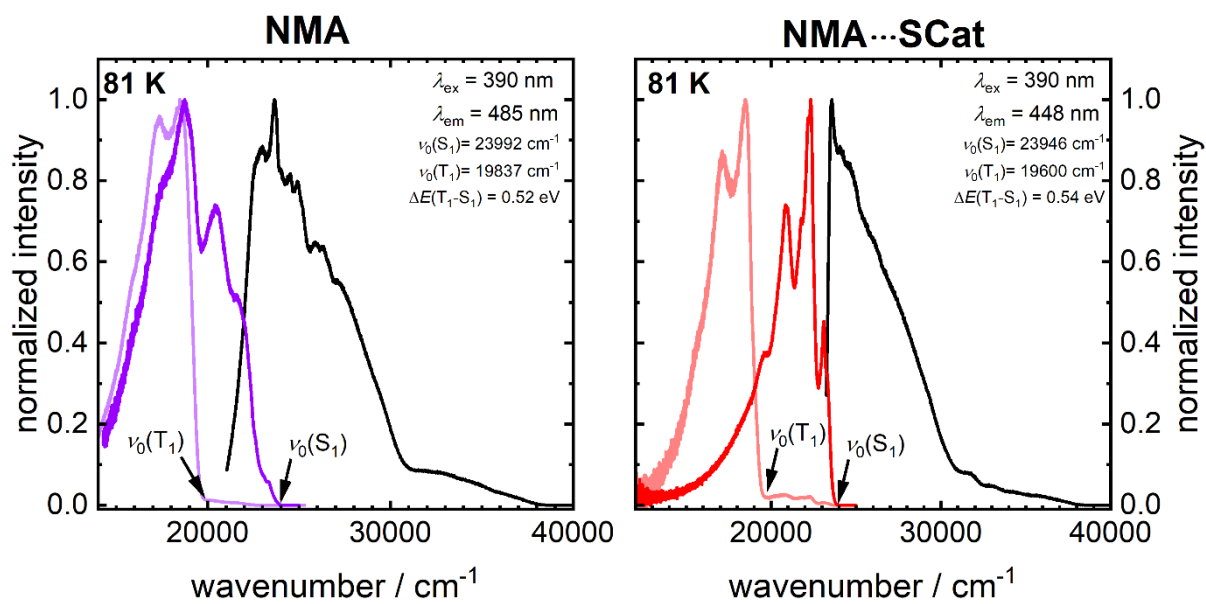

226

227 **Figure S13:** Excitation (black) and emission spectra of NMA (violet) and NMA...SCat (red)  
 228 at 81 K. The emission after a 1 ms delay is depicted in the corresponding desaturated color.  
 229 To estimate the energy gap  $\Delta E_{S_1T_1}$ , the highest onset energy of the fluorescence and  
 230 phosphorescence band was determined (see markings).

231 **Additional quantum chemical results**

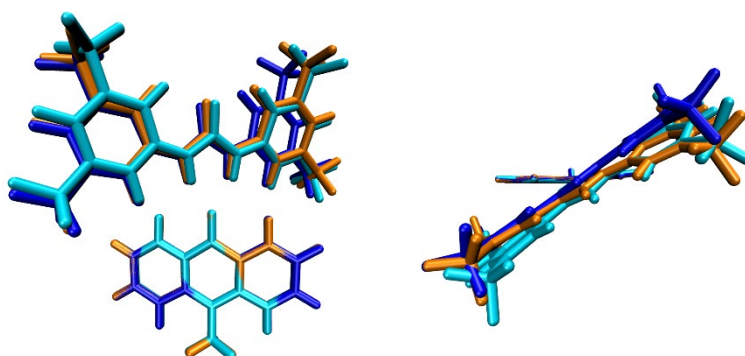

232

233 **Figure S14:** Different perspective on the overlay of optimized geometries in different  
234 environments. This overlay shows that the environment (PCM and QM-MM) has only a minute  
235 effect on the geometry. Toluene (blue), crystal structure with optimized hydrogen atoms  
236 (orange), optimized structure in solid state environment (turquoise).

237

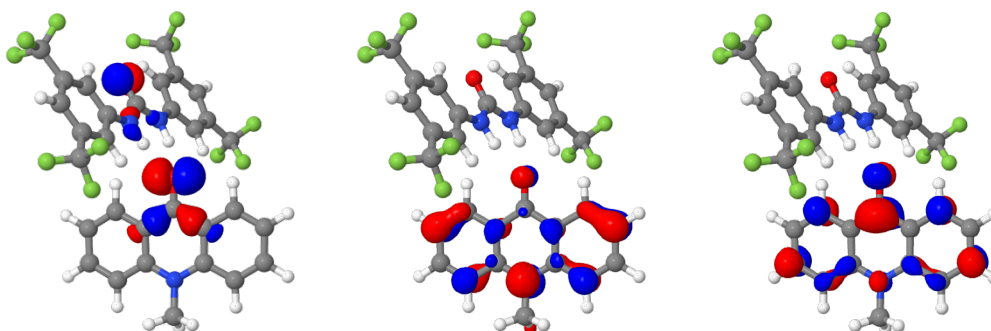

238

239 **Figure S15:** Orbitals that are involved in the relevant energetically lowest transitions at the  
240 optimized ground state geometry. From left to right: HOMO-8 (n-orbital), HOMO ( $\pi$ -orbital),  
241 LUMO ( $\pi$ -orbital).

242

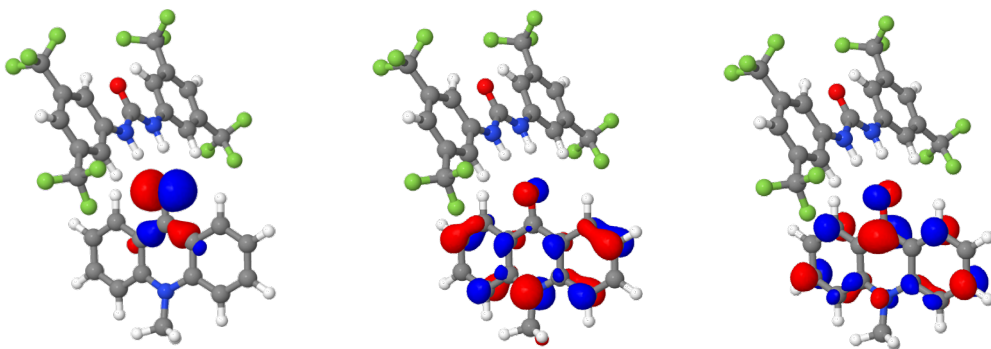

243 **Figure S16:** Orbitals that are involved in the energetically lowest transitions at the optimized  
244  $n\pi^*$ -triplet state geometry. From left to right: HOMO-8 (n-orbital), HOMO ( $\pi$ -orbital), LUMO  
245 ( $\pi$ -orbital).

246  
 247  
 248  
 249  
 250  
 251  
 252  
 253  
 254  
 255  
 256  
 257  
 258  
 259  
 260  
 261  
 262  
 263  
 264  
 265  
 266  
 267  
 268

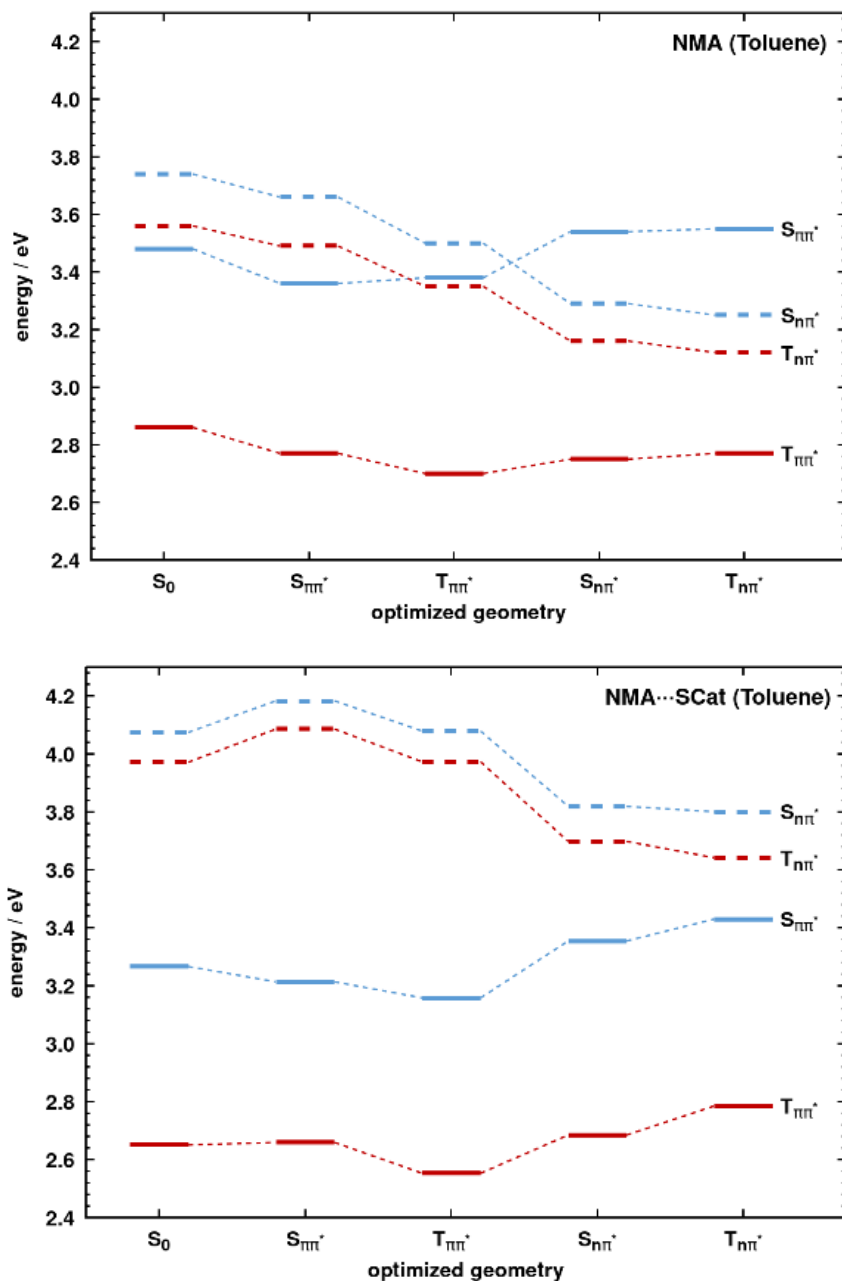

269 **Figure S17:** Adiabatic energies without ZPVE correction for the electronic ground state and  
 270 the optimized geometries of selected lowest excited states of NMA (left) and NMA...SCat  
 271 (right). In both cases, the  $^1n\pi^*$  represents the  $S_2$  state at the ground-state geometry. The  $^3n\pi^*$   
 272 state is found as the tenth excited triplet state ( $T_{10}$ ) in the NMA...SCat complex. Intermediate  
 273  $^3\pi\pi^*$  states lying energetically about 0.9 – 1 eV above the  $T_1$  ( $^3\pi\pi^*$ ) state have been omitted.

274

### 275 Thermogravimetric analysis

276 The TG data show a complete one-step degradation for each of the starting materials and the  
 277 co-crystal. Additionally, NMA and NMA...SCat exhibit partial sublimation prior to the onset  
 278 of thermal decomposition. This effect is more pronounced in the pure NMA which repeatedly  
 279 causes spikes in the respective curve.

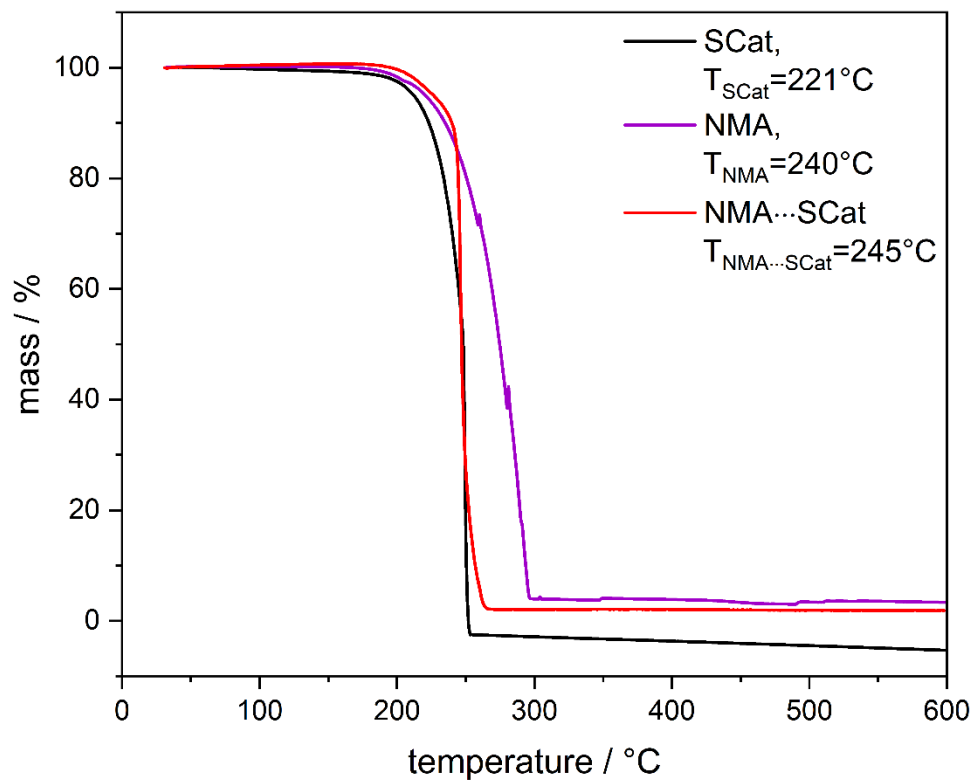

280

281 **Figure S18:** TG curves of NMA, SCat and NMA...SCat with onset decomposition  
 282 temperatures, measured under the synthetic air/nitrogen atmosphere from 30 °C to 600 °C. The  
 283 mass loss amounts 96% for NMA, 100% for SCat and 98% for NMA...SCat.

284 **REFERENCES**

- 285 1. K. Hirose, *J. Incl. Phenom. Macrocycl. Chem.*, 2001, **39**, 193-209.  
286 2. P. Thordarson, *Chem. Soc. Rev.*, 2011, **40**, 1305-1323.  
287 3. S. W. Benson, *The Foundation of Chemical Kinetics*, McGraw Hill Book Company Inc, New  
288 York, 1960.  
289 4. M.-C. Justice and J.-C. Justice, *J. Solution Chem.*, 1976, **5**, 543-561.  
290 5. J. B. Maglic and R. Lavendomme, *J. Appl. Cryst.*, 2022, **55**, 1033-1044.  
291 6. O. Peterson, J. Webb, W. McColgin and J. Eberly, *J. Appl. Phys.*, 1971, **42**, 1917-1928.  
292 7. A. Deshpande, A. Beidoun, A. Penzkofer and G. Wagenblast, *Chem. Phys.*, 1990, **142**, 123-  
293 131.  
294 8. T. Villnow, G. Ryseck, V. Rai-Constapel, C. Marian and P. Gilch, *J. Phys. Chem. A.*, 2014, **118**,  
295 11696-11707.
